# Supplementary material for: Tolerance to mild salinity stress in japonica rice: A genome-wide association mapping study highlights calcium signaling and metabolism genes
Source: PubMed Central journal article supplement (PMC5771603; doi:10.1371/journal.pone.0190964), 2018-01-17

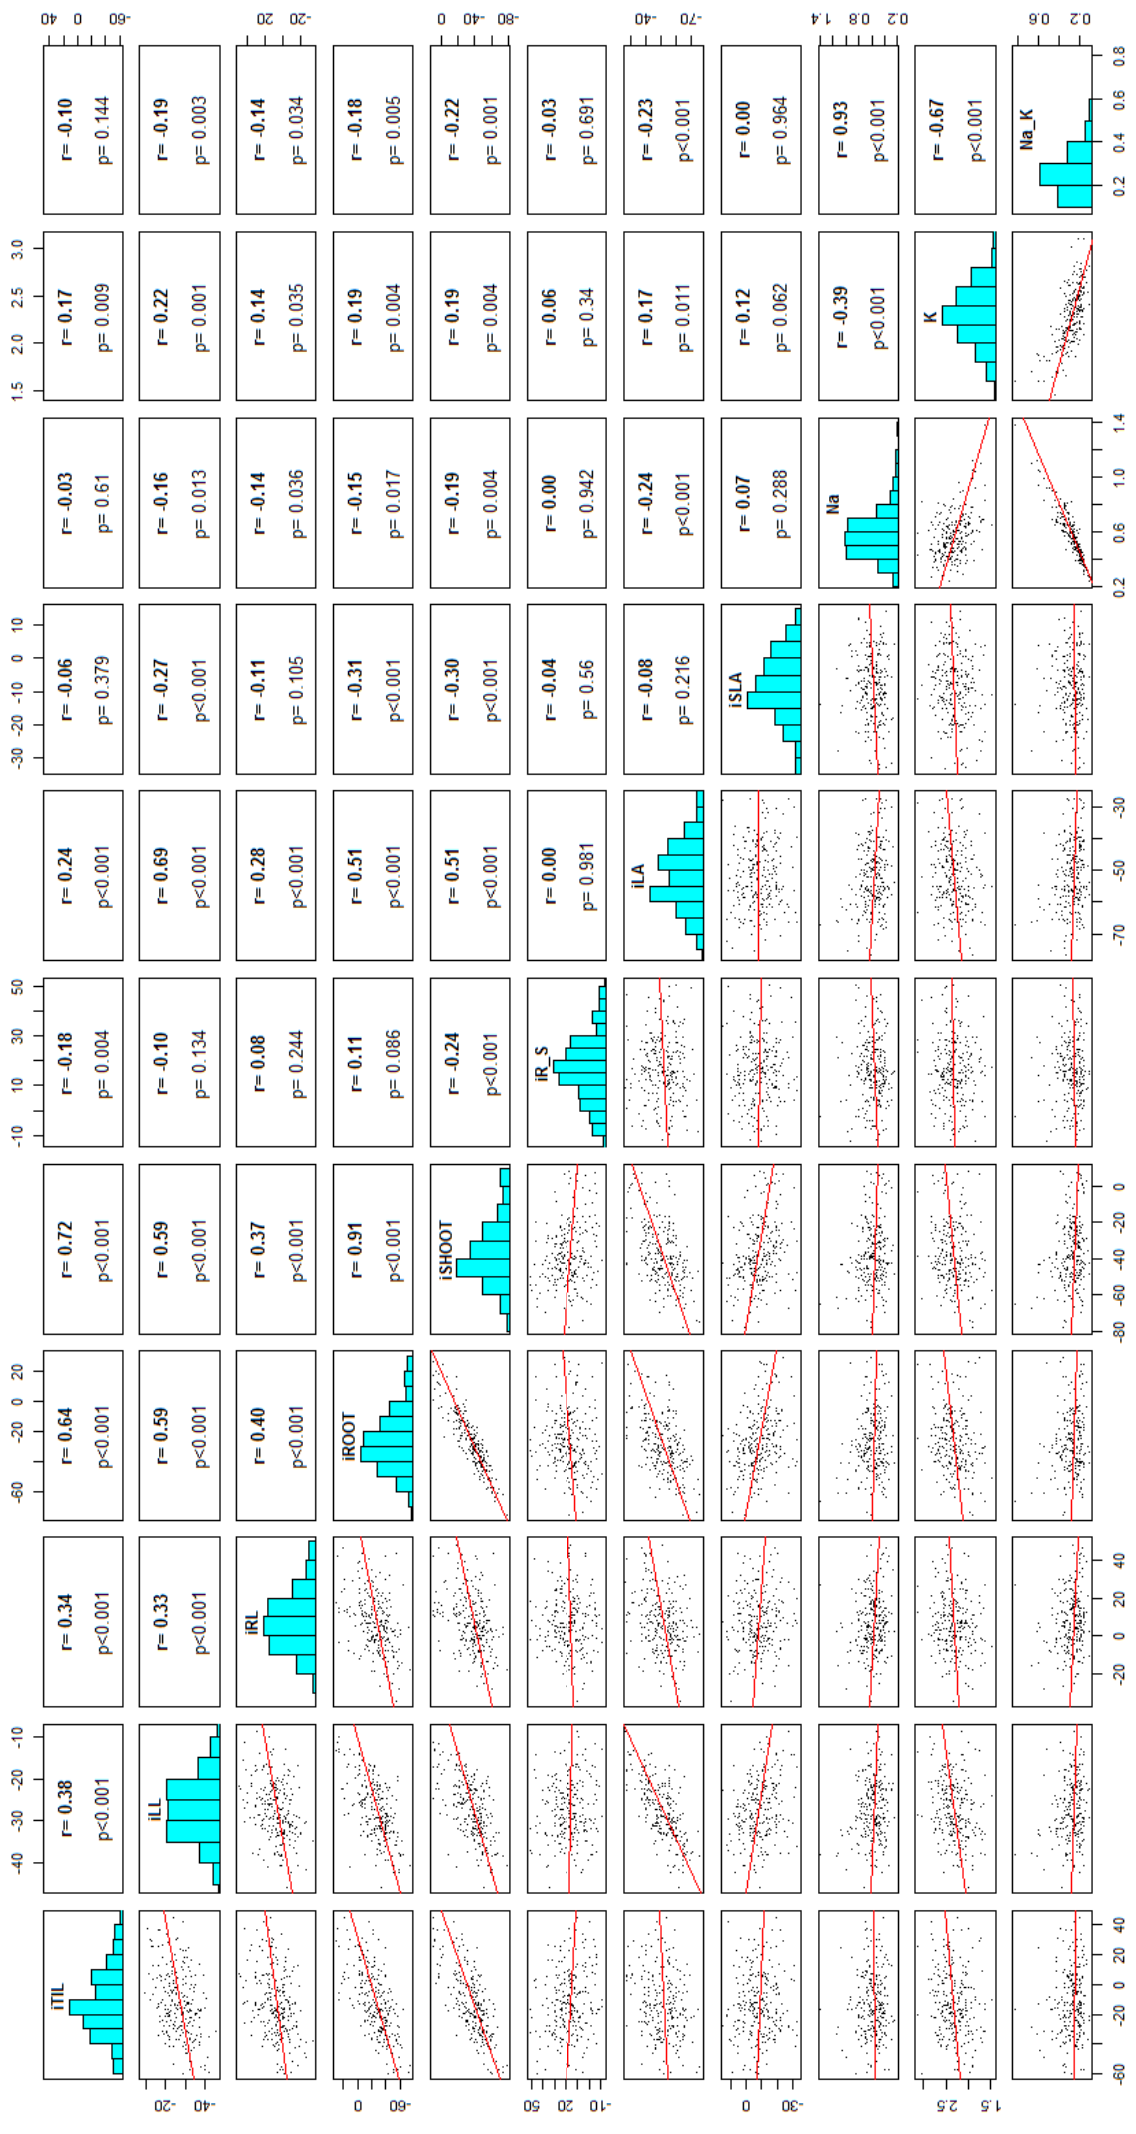

Supplement: pone.0190964.s006.pdf [file pone.0190964.s006.pdf]
