# Supplementary material for: Tolerance to mild salinity stress in japonica rice: A genome-wide association mapping study highlights calcium signaling and metabolism genes
Source: PubMed Central journal article supplement (PMC5771603; doi:10.1371/journal.pone.0190964), 2018-01-17

- Indica
- Aus
- Aromatic
- Temperate japonica
- Tropical japonica
- Accessions from GreenRice panel

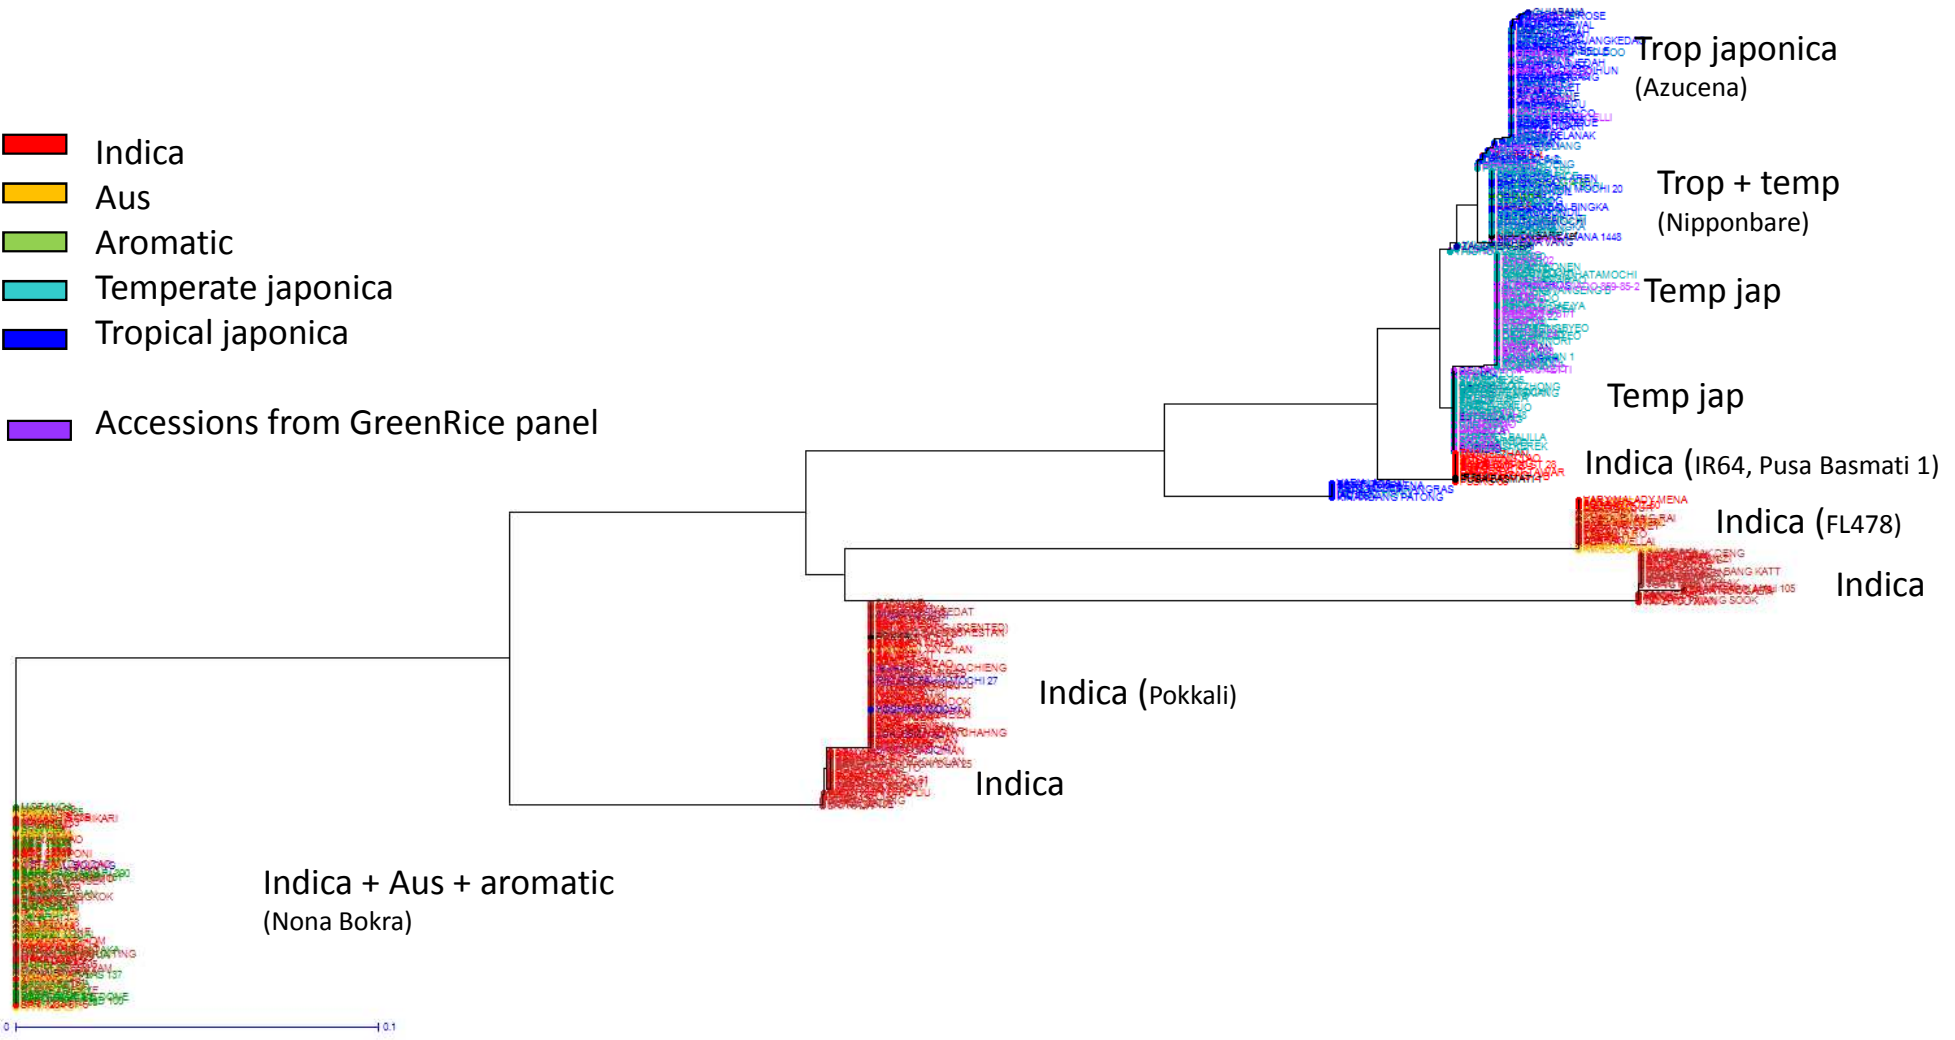

Supplement: pone.0190964.s010.pdf [file pone.0190964.s010.pdf]
